# Supplementary material for: Synergistic polyphenol–amino acid nanoparticles: a new strategy for reactive oxygen species management
Source: Royal Society of Chemistry journal article supplement (doi:10.1039/d4ra08496a), 2025-01-01
Supplement: d4ra08496a1.pdf [file d4ra08496a1.pdf]

## **Synergistic polyphenol-amino acid nanoparticles: a new strategy for reactive oxygen species management**

Huizhou Ye<sup>1,#</sup>, Jiayin Cai<sup>3,#</sup>, Zhihao Shen<sup>4</sup>, Qiuping Qian<sup>2</sup>, Jiashu Zhang<sup>1,\*</sup>

<sup>1</sup>The Second Affiliated Hospital and Yuying Children's Hospital of Wenzhou Medical University, Wenzhou, Zhejiang 325000, China, 51774130@qq.com

<sup>2</sup>Zhejiang Engineering Research Center for Tissue Repair Materials, Wenzhou Institute, University of Chinese Academy of Sciences, Wenzhou, Zhejiang 325000, China

<sup>3</sup>Zhejiang Chinese Medical University, Hangzhou, Zhejiang 310053, China

<sup>4</sup>Joint Center of Translational Medicine, The First Affiliated Hospital of Wenzhou Medical University, Wenzhou, Zhejiang 325000, China

<sup>#</sup>These authors (Huizhou Ye, Jiayin Cai) contributed equally.

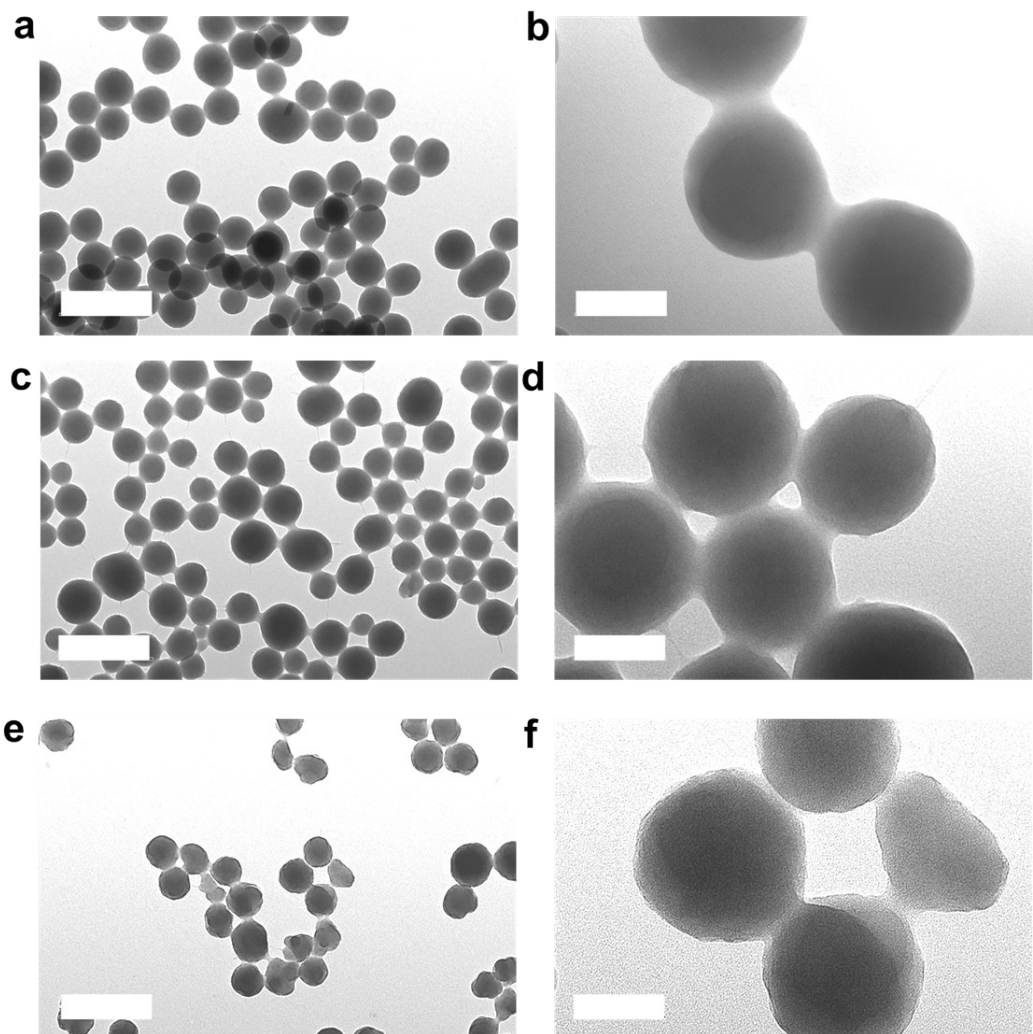

Fig. 1 TEM Images of PTR nanoparticles by adjusting the concentration Arg (R), (a, b)  $[Arg]/[TP]=1/4$ , (c, d)  $[Arg]/[TP]=1/2$ , (e, f)  $[Arg]/[TP]=1$ , (a, c, e), Scale bar: 500 nm, (b,d,f), Scale bar: 100 nm.

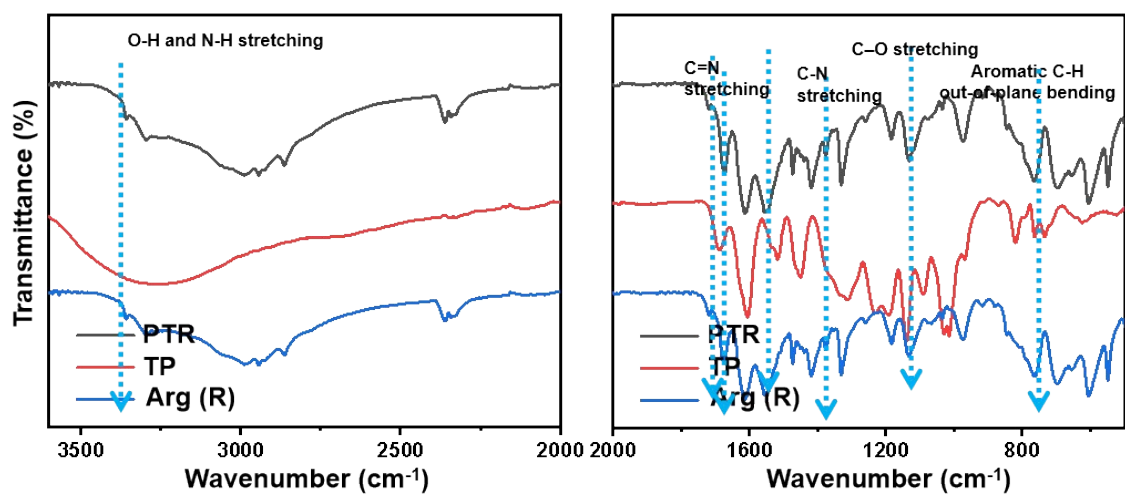

Fig. S2 FTIR spectrum of PTR NP, TP, Arg(R).

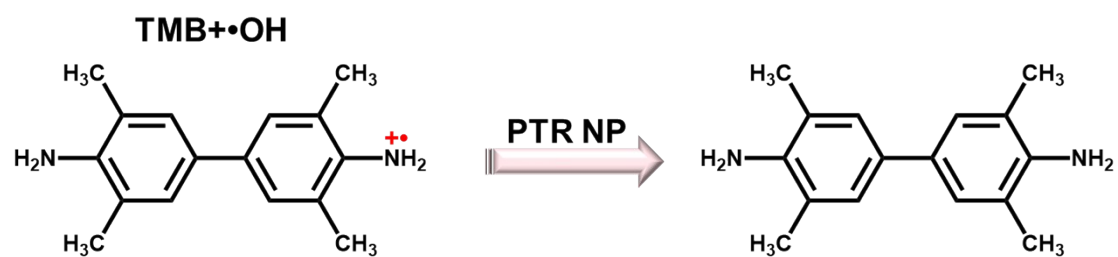

Fig.3 Schematic illustration of the TMB + OH• scavenging process

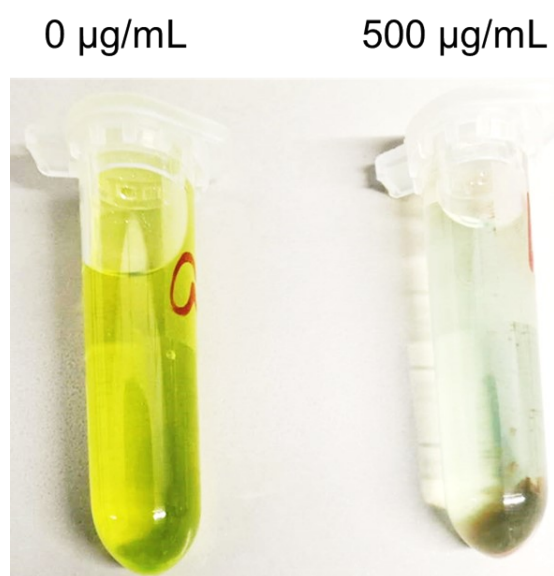

Fig. S4 Photograph of TMB+•OH after incubation with PBS solution and PTA NP.
